# Supplementary material
Source: PubMed Central journal article supplement (PMC9534352)
Supplement: NIHMS1822236-supplement-Supporting_Information.pdf [file NIHMS1822236-supplement-Supporting_Information.pdf]

Supporting Information for

## **Quantification of Ni-N-O bond angles and NO activation by X-ray emission spectroscopy**

Phan N. Phu,<sup>1†</sup> Carlos Gutierrez,<sup>1</sup> Subrata Kundu,<sup>2,3</sup> Dimosthenis Sokaras,<sup>4</sup> Thomas Kroll,<sup>4</sup> Timothy H. Warren,<sup>2\*</sup> S. Chantal E. Stieber<sup>1\*</sup>

<sup>1</sup> Department of Chemistry & Biochemistry, California State Polytechnic University, Pomona, California 91768, United States.

<sup>2</sup> Department of Chemistry, Georgetown University, Box 571227, Washington, DC 20057-1227, United States.

<sup>3</sup> School of Chemistry, Indian Institute of Science Education and Research Thiruvananthapuram, Kerala 695551, India.

<sup>4</sup> Stanford Synchrotron Radiation Lightsource, SLAC National Accelerator Laboratory, Menlo Park, California 94025, United States.

\*Corresponding author email: [sestieber@cpp.edu](mailto:sestieber@cpp.edu) (S.C.E.S); [thw@georgetown.edu](mailto:thw@georgetown.edu) (T.H.W.)

### **Table of Contents**

|                          |           |
|--------------------------|-----------|
| 1. XES Details           | <b>S2</b> |
| 2. Computational Details | <b>S2</b> |

## 1. XES details

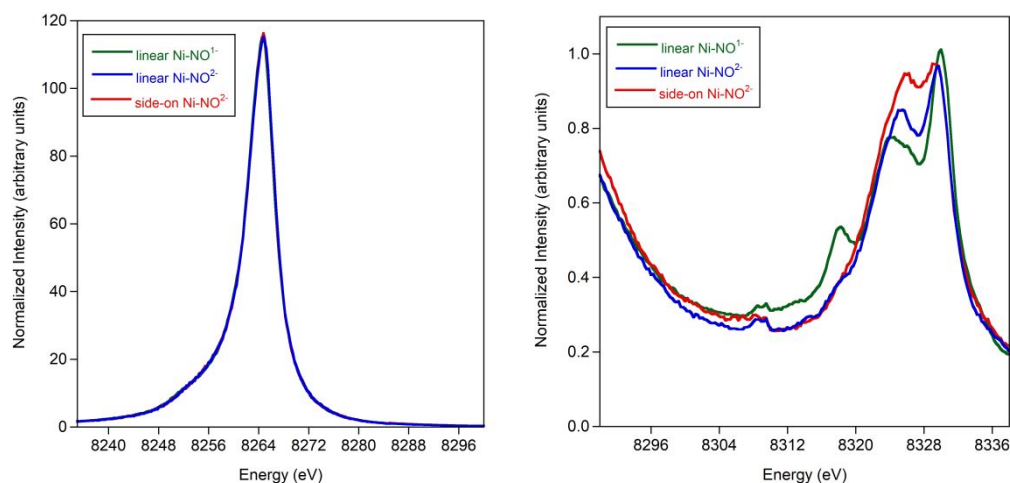

**Figure S1.** K $\beta$  main line (left) and VtC (right) XES of [*i*Pr<sub>2</sub>NNF<sub>6</sub>]NiNO (linear Ni-(NO<sup>1-</sup>), green), [*i*Pr<sub>2</sub>NNF<sub>6</sub>]Ni( $\mu$ - $\eta^1$ : $\eta^1$ -NO)K[2.2.2-cryptand] (linear Ni-(NO<sup>2-</sup>), blue), and [*i*Pr<sub>2</sub>NNF<sub>6</sub>]Ni( $\mu$ - $\eta^2$ : $\eta^2$ -NO)K(18-crown-6)(THF) (side-on Ni-(NO<sup>2-</sup>), red).

## 2. Computational details

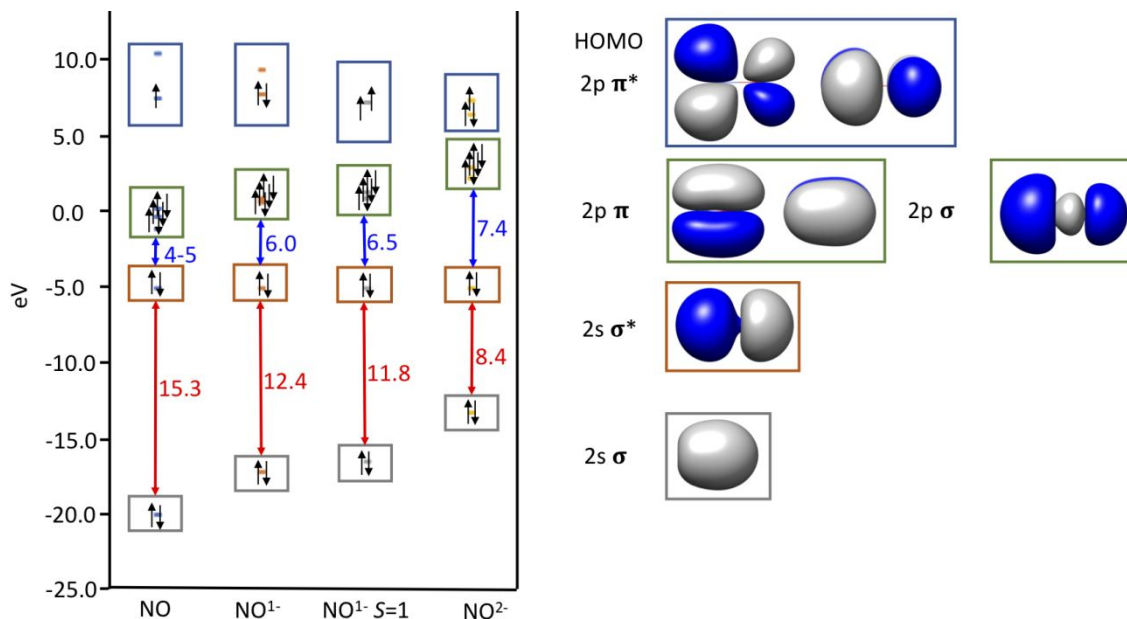

**Figure S2.** Qualitative MO energy diagram for NO, NO<sup>1-</sup> ( $S = 0$ ), NO<sup>1-</sup> ( $S = 1$ ), and NO<sup>2-</sup> from DFT geometry optimization, along with visualization of corresponding orbitals. The energy scale was calibrated to the 2s  $\sigma^*$  orbital to reflect the small change in energy of the NO 2s  $\sigma^*$  orbital observed for the studied nickel nitrosyl complexes.

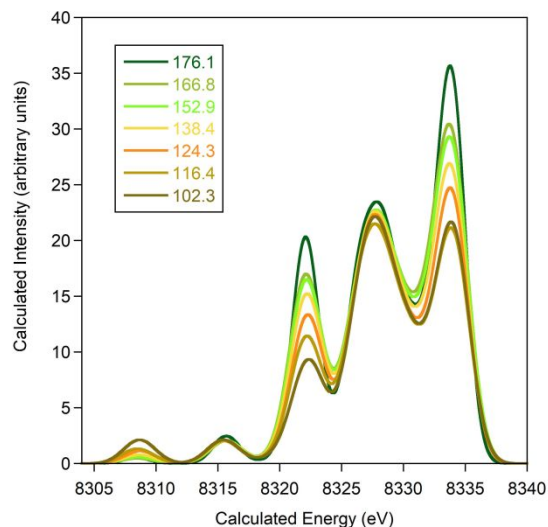

**Figure S3.** Calculated VtC XES spectrum of Ni-(NO<sup>1-</sup>) with varying the Ni-N-O angle from 102-176°. A shift of 217.0 eV and a broadening of 2.5 eV were applied to the computed data.

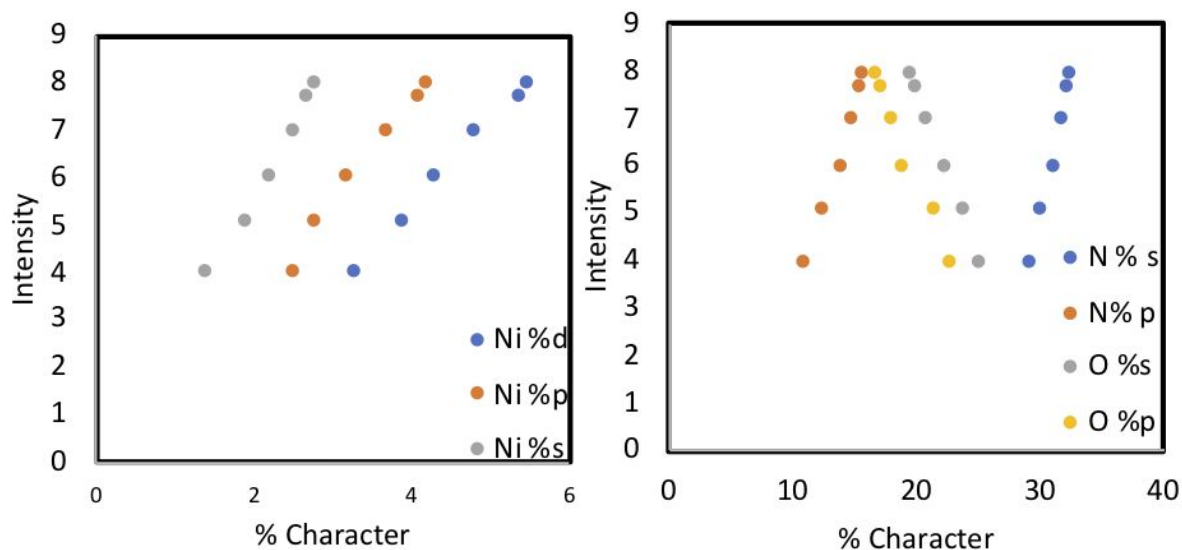

**Figure S4.** Total intensity versus calculated nickel character (left) and NO character (right) in transitions contributing to XES VtC spectral feature around 8322 eV for the calculated VtC XES spectrum of Ni-(NO<sup>1-</sup>) with varying the Ni-N-O angle from 102-176°.

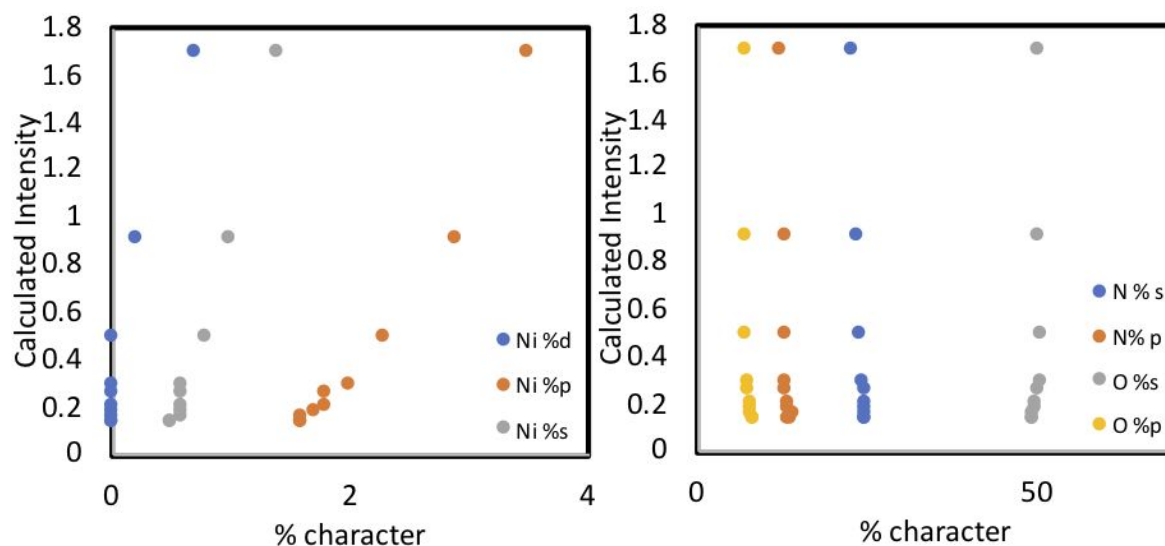

**Figure S5.** Total intensity versus calculated nickel character (left) and NO character (right) in transitions contributing to XES VtC spectral feature around 8310.7 eV for the calculated VtC XES spectrum of Ni-(NO<sup>2-</sup>) with varying the Ni-N-O angle from 80-160°.

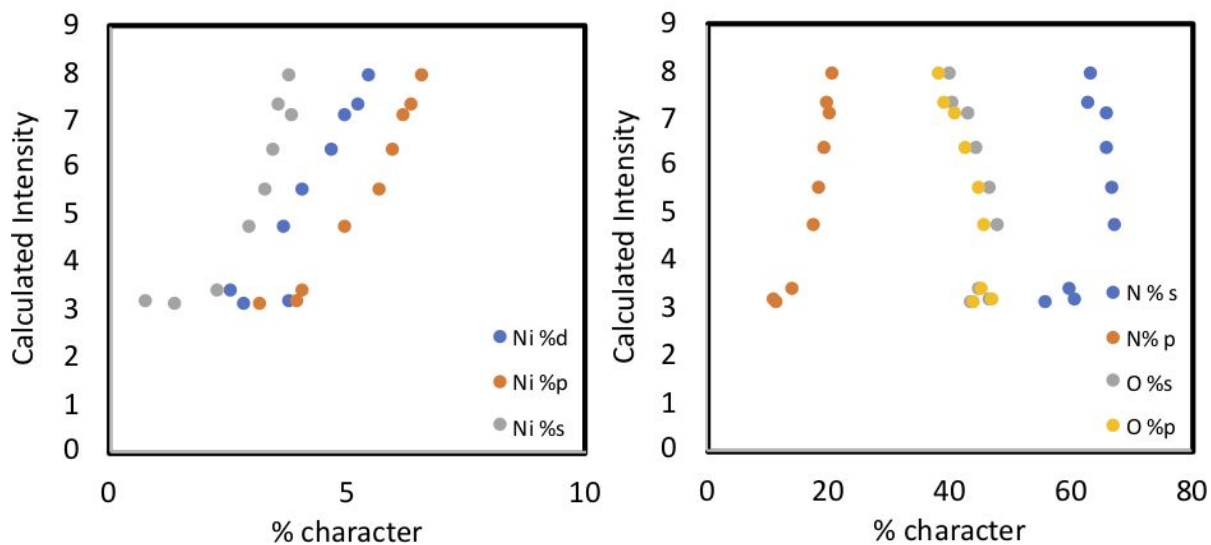

**Figure S6.** Total intensity versus calculated nickel character (left) and NO character (right) in transitions contributing to XES VtC spectral feature around 8322 eV for the calculated VtC XES spectrum of Ni-(NO<sup>2-</sup>) with varying the Ni-N-O angle from 80-160°.

**Table S1.** Ni-NO bond angles (deg.) and distances (Å) resulting from geometry optimizations with fixed Ni-N-O bond angles for  $[\text{Pr}_2\text{NNF}_6]\text{NiNO}$ , Ni-(NO<sup>1-</sup>).

| Ni-N-O angle (deg.) | Ni-N distance (Å) | Ni-O distance (Å) | N-O distance (Å) |
|---------------------|-------------------|-------------------|------------------|
| 176.1               | 1.632             | 2.784             | 1.153            |
| 166.8               | 1.635             | 2.772             | 1.155            |
| 152.9               | 1.64              | 2.772             | 1.158            |
| 138.4               | 1.654             | 2.639             | 1.163            |
| 124.3               | 1.675             | 2.526             | 1.17             |
| 116.4               | 1.701             | 2.457             | 1.173            |
| 102.3               | 1.718             | 2.283             | 1.184            |

**Table S2.** Ni-NO bond angle (deg.) and distances (Å) resulting from geometry optimizations with fixed Ni-N-O bond angles for Ni-(NO<sup>2-</sup>).

| Ni-N-O angle (deg.) | Ni-N distance (Å) | Ni-O distance (Å) | N-O distance (Å) |
|---------------------|-------------------|-------------------|------------------|
| 160                 | 1.771             | 2.944             | 1.217            |
| 150                 | 1.784             | 2.905             | 1.22             |
| 140                 | 1.801             | 2.848             | 1.222            |
| 130                 | 1.827             | 2.78              | 1.227            |
| 120                 | 1.849             | 2.688             | 1.234            |
| 110                 | 1.897             | 2.6               | 1.244            |
| 100                 | 1.877             | 2.427             | 1.247            |
| 90                  | 1.847             | 2.232             | 1.253            |
| 80                  | 1.83              | 2.036             | 1.265            |

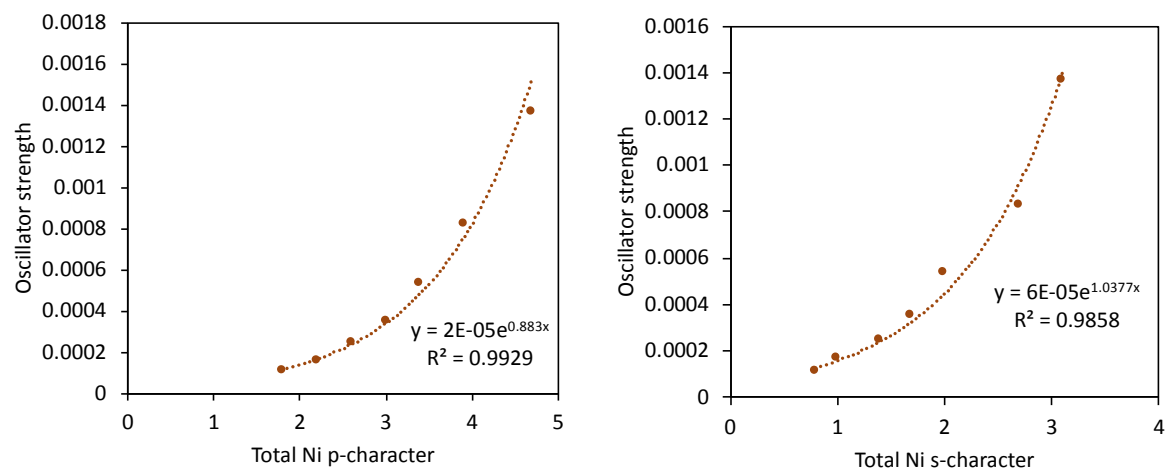

**Figure S7.** Total oscillator strength versus calculated nickel *p*-character (left) and *s*-character (right) in transitions contributing to XES VtC spectral feature around 8322 eV for linear Ni-(NO<sup>1-</sup>) with fixed Ni-N distances.

**Table S3.** Total oscillator strength versus calculated percent nickel *p*-character and *s*-character in transitions contributing to XES VtC spectral feature around 8322 eV for linear Ni-(NO<sup>1-</sup>) with fixed Ni-N distances.

| Energy (eV)      | Ni-N distance (Å) | Total Ni <i>p</i> -character (%) | Total Ni <i>s</i> -character (%) |
|------------------|-------------------|----------------------------------|----------------------------------|
| 8321.99          | 1.527             | 4.7                              | 3.1                              |
| 8322.07, 8322.20 | 1.627             | 3.9                              | 2.7                              |
| 8322.21          | 1.727             | 3.4                              | 2.0                              |
| 8322.24          | 1.827             | 3.0                              | 1.7                              |
| 8322.25, 8322.68 | 1.927             | 2.6                              | 1.4                              |
| 8322.23, 8322.57 | 2.027             | 2.2                              | 1.0                              |
| 8322.19, 8322.46 | 2.127             | 1.8                              | 0.8                              |

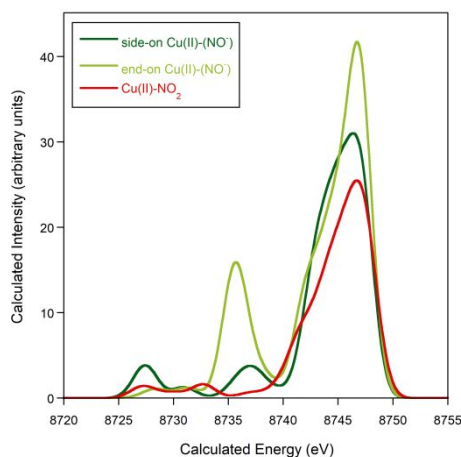

**Figure S8.** Calculated VtC XES spectrum of NiR for side-on Cu(II)-(NO<sup>-</sup>), end-on Cu(II)-(NO<sup>-</sup>), and Cu(II)-NO<sub>2</sub>. The energy scale is not calibrated, and a broadening of 2.5 eV was applied.

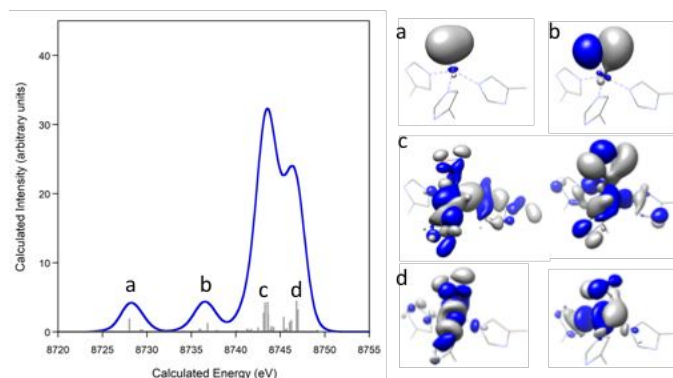

**Figure S9.** Calculated VtC XES spectrum of NiR for side-on Cu(I)-(NO<sup>+</sup>) with the molecular orbitals that strongly contribute to the observed transitions. The energy scale is not calibrated, and a broadening of 2.5 eV was applied.

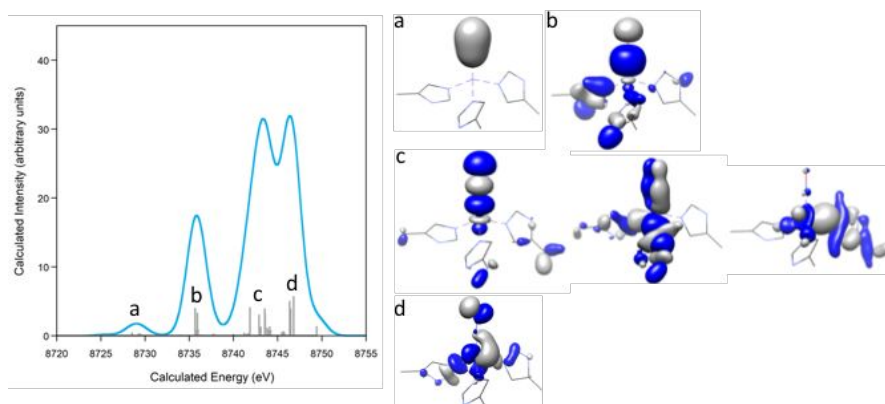

**Figure S10.** Calculated VtC XES spectrum of NiR for end-on Cu(I)-(NO<sup>+</sup>), with the molecular orbitals that strongly contribute to the observed transitions. The energy scale is not calibrated, and a broadening of 2.5 eV was applied.

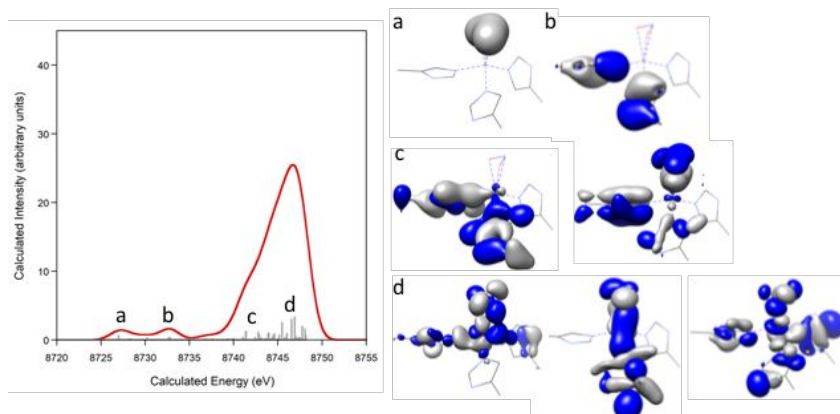

**Figure S11.** Calculated VtC XES spectrum of NiR for Cu(II)-NO<sub>2</sub> with the molecular orbitals that strongly contribute to the observed transitions. The energy scale is not calibrated, and a broadening of 2.5 eV was applied.

**Representative geometry optimization input file for fixed Ni-N-O angle of 150° (ORCA):**

```
! UKS B3LYP RIJCOSX SlowConv TightSCF def2-SV(P) def2-SVP/J Normalprint OPT PAL8
%geom Constraints
  { A 0 2 4 150.0 C }
  end
  end

%basis NewGTO 28 "def2-TZVP(-f)" end
      NewGTO 7 "def2-TZVP(-f)" end
      NewGTO 8 "def2-TZVP(-f)" end
      NewAuxGTO 28 "def2-TZVP/J" end
      NewAuxGTO 7 "def2-TZVP/J" end
```

```
NewAuxGTO 8 "def2-TZVP/J" end
end

%scf    MaxIter 3000
        ToIE 1E-7
        TolErr 1E-6
        end

* xyz 0 1 coordinates.xyz
```

### **Representative XES input file (ORCA):**

```
! UKS BP86 TZVP def2-TZV/J TightSCF SlowConv COSMO SCFConv7 PAL8
! Normalprint
! grid4 nofinalgrid

%basis  newgto Ni "CP(PPP)" end
        end

%method    SpecialGridAtoms 28
           SpecialGridIntAcc 7
           end

%scf      MaxIter 1000
          ToIE 1e-7
          TolErr 1e-6
          end

* xyzfile 0 1 coordinates.xyz

%xes
        CoreOrb 0,0
        OrbOp 0,1
        End
```

### **Atomic coordinates used in calculations (xyz format):**

1. Previously published geometry optimized coordinates for linear Ni-NO<sup>1-</sup>, linear Ni-NO<sup>2-</sup>, and side-on Ni-NO<sup>2-</sup> were used from reference 3.
2. All other geometry optimized coordinates and atomic coordinates can be found on the Zenodo repository under DOI: 10.5281/zenodo.3911324
